# Supplementary material
Source: ML conference proceedings conference paper supplement (https://www.ecva.net/papers/eccv_2022/papers_ECCV/html/136660001_ECCV_2022_paper.php)
Supplement: Supplementary file 1 [file 136660001-supp.pdf]

# UnrealEgo: A New Dataset for Robust Egocentric 3D Human Motion Capture

## —Supplementary Material—

Hiroyasu Akada<sup>1,2</sup> , Jian Wang<sup>1</sup> , Soshi Shimada<sup>1</sup>, Masaki Takahashi<sup>2</sup>,  
Christian Theobalt<sup>1</sup>, and Vladislav Golyanik<sup>1</sup>

<sup>1</sup> Max Planck Institute for Informatics, SIC

<sup>2</sup> Keio University

This supplementary material provides more details on our assets, including realistic 3D human models and environments, and motion modification. Please also watch the supplementary video<sup>3</sup> for dynamic visualization of UnrealEgo.

## A Asset List

### A.1 Characters

We use 17 realistic RenderPeople 3D human models (commercially available) [2], *i.e.*, nine female and eight male. Table 9 summarizes the RenderPeople models that we use for UnrealEgo. These models are rigged and skinned based on the default 3D human skeleton of Unreal Engine [3] as shown in Fig. 9. Readers are referred to RenderPeople web page [2] for more details on their human models.

Table 9: List of characters.

| Model name            | Gender | Skin color     | Clothes                               | Shoes        |
|-----------------------|--------|----------------|---------------------------------------|--------------|
| rp_adanna_rigged.003  | Female | Dark brown     | Scrubs                                | Sneakers     |
| rp_amit_rigged.003    | Male   | Dark brown     | T-shirts, jeans                       | Sneakers     |
| rp_carla_rigged.001   | Female | Dark brown     | Suit jackets, slacks                  | High heels   |
| rp_claudia_rigged.002 | Female | Pale white     | Long sleeves, slacks                  | High heels   |
| rp_eric_rigged.001    | Male   | Light brown    | Long sleeves, vest, slacks            | Brogues      |
| rp_janna_rigged.002   | Female | White          | Scrubs                                | Sneakers     |
| rp_joko_rigged.003    | Male   | White          | Turnout coat, bunker gear             | Bunker gear  |
| rp_joyce_rigged.005   | Female | Black          | Dress with long pants                 | High heels   |
| rp_kyle_rigged.001    | Male   | Light brown    | Scrubs                                | Sneakers     |
| rp_manuel_rigged.001  | Male   | White          | T-shirts, jeans                       | Sneakers     |
| rp_maya_rigged.003    | Female | Pale white     | Long sleeves, shorts, tights          | Sneakers     |
| rp_nathan_rigged.003  | Male   | Light brown    | T-shirts, jeans                       | Sneakers     |
| rp_rin_rigged.007     | Female | White          | Dress                                 | High heels   |
| rp_scott_rigged.005   | Male   | White          | T-shirts, safety vest, athletic pants | Hiking boots |
| rp_serena_rigged.004  | Female | Black          | Short sleeves, shorts                 | Sneakers     |
| rp_shawn_rigged.004   | Male   | Moderate brown | Scrubs                                | Sneakers     |
| rp_sophia_rigged.003  | Female | Moderate brown | No sleeves, jeans                     | Flats        |

<sup>3</sup> <https://4dqv.mpi-inf.mpg.de/UnrealEgo/>

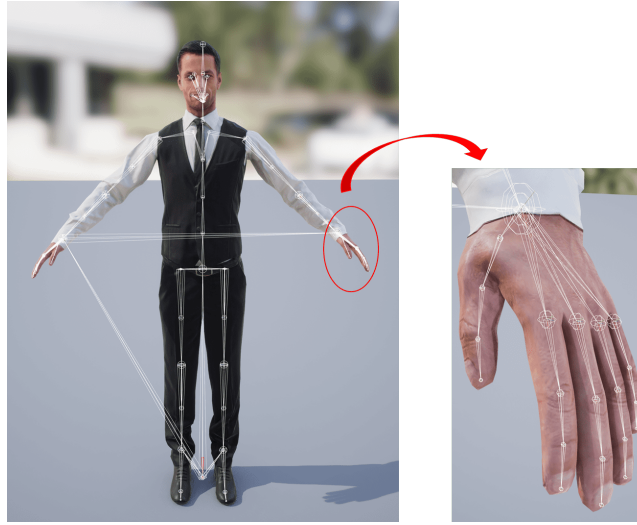

Fig. 9: The skeleton of the RenderPeople models.

## A.2 3D Environments

We provide the asset list of 3D environments used for UnrealEgo in Table 10. All of the environments are commercially available on the UnrealEngine marketplace. Ray tracing is enabled if the environments support it or rasterization rendering is used otherwise. Also, the rendering process of UnrealEngine includes deferred shading, global illumination, lit translucency, post-processing, and GPU particle simulation utilizing vector fields. Please also take a look at the UnrealEngine documentation [18] for more details on their rendering system.

Table 10: List of 3D environments used in UnrealEgo.

| Environment name                             | Ray-tracing | Example scenes                                                                                  |
|----------------------------------------------|-------------|-------------------------------------------------------------------------------------------------|
| ArchViz Interior [4]                         | ✓           | North-American rooms                                                                            |
| Big Office [5]                               | ✓           | Offices, cafeterias, playrooms, restrooms, elevators                                            |
| Downtown West Modular Pack [8]               | ✓           | Outdoor shopping mall, roads, water fountain                                                    |
| Hutong/Chinese Alleyway Pack [10]            | ✓           | Alleys, bicycle parking                                                                         |
| Japanese Restaurant Interior & Exterior [11] | ✓           | Traditional Japanese izakaya                                                                    |
| Realistic Lab. Laboratory Equipment [15]     | ✓           | Lab rooms                                                                                       |
| Modern Chinese Interior [13]                 | ✓           | Chinese rooms                                                                                   |
| Modular Building Set [14]                    | ✓           | Old buildings                                                                                   |
| Kyoto Alley [12]                             |             | Traditional Kyoto shopping roads, temples                                                       |
| Science Lab [16]                             |             | Lab rooms                                                                                       |
| City Subway Train Modular [7]                |             | Trains                                                                                          |
| CityPark [6]                                 |             | Parks, roads, bridges, gardens, tennis courts, baseball fields, football fields, water fountain |
| Factory Environment Collection [9]           |             | Heavy truck manufacturing lines, warehouses, offices, changing rooms                            |
| Suburb Neighborhood House Pack [17]          |             | North-American houses, kitchens, rooms, stairs, gardens, pools, roads                           |

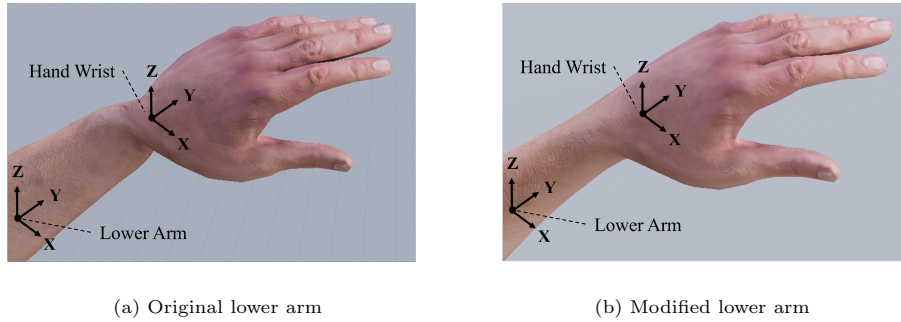

Fig. 10: Modification for the lower arm distortion in Mixamo motions [1]. The lower arms of the original Mixamo motions often show unnatural distortion. Therefore, we provide 70% of rotation of hand wrists around the Y axis to that of lower arms to maximize the plausibility of arm movements.

## B Motions

As mentioned in Section 3.1 of the main paper, we utilize Mixamo motions [1] and modify them using UnrealEngine [3] to enhance their plausibility and diversify the motion data. Here, we use the default functions of UnrealEngine, *i.e.*, the control rig, to manually fix some motions that involve self-penetration or unnatural body distortion. In particular, we work on the problem of lower arm distortion. The main issue here is that the Mixamo motions lack rotation information of the lower arms of the UnrealEngine skeleton. Due to this, the original motions show unnatural distortion of the lower arms as shown in Fig. 10-(a). To alleviate this issue, we add constraints on the amount of rotations of the lower arms. Specifically, we provide 70% of rotations of hand wrists around the Y axis to those of the lower arms to maximize the plausibility of arm movements. We show the modified version in Fig. 10-(b).

Also, we manually diversify the motions in various ways, including the speed of motions, arm movements, foot stance, and head rotations. The change of the head rotations is especially important for egocentric datasets because the slight change will lead to a dramatic change of egocentric views even with similar poses. Please note that xR-EgoPose [19] also uses the Mixamo motions as mentioned in Section 2.2. However, our manual modifications allow UnrealEgo to provide motions with more different types of poses than xR-EgoPose as discussed in Section 3.2.

Moreover, unlike previously proposed datasets [19,20], UnrealEgo does not contain the exact same motions captured in multiple different scenes. This makes UnrealEgo a unique dataset with the largest variety of motions.

## References

1. Mixamo (2022), <https://www.mixamo.com>
2. Renderpeople (2022), <https://renderpeople.com>
3. Unreal engine (2022), <https://www.unrealengine.com>
4. Unreal engine marketplace, archviz interior (2022), <https://www.unrealengine.com/marketplace/en-US/product/archvis-interior-rendering>
5. Unreal engine marketplace, big office (2022), <https://www.unrealengine.com/marketplace/en-US/product/big-office>
6. Unreal engine marketplace, city park environment collection (2022), <https://www.unrealengine.com/marketplace/en-US/product/city-park-environment-collection>
7. Unreal engine marketplace, city subway train modular (2022), <https://www.unrealengine.com/marketplace/en-US/product/city-subway-train-modular>
8. Unreal engine marketplace, downtown west modular pack (2022), <https://www.unrealengine.com/marketplace/en-US/product/6bb93c7515e148a1a0a0ec263db67d5b>
9. Unreal engine marketplace, factory environment collection (2022), <https://www.unrealengine.com/marketplace/en-US/product/factory-environment-collection>
10. Unreal engine marketplace, hutong/chinese alleyway pack (2022), <https://www.unrealengine.com/marketplace/en-US/product/hutong-chinese-alleyway-pack>
11. Unreal engine marketplace, japanese restaurant interior & exterior (2022), <https://www.unrealengine.com/marketplace/en-US/product/japanese-restaurant-interior-exterior>
12. Unreal engine marketplace, kyoto alley (2022), <https://www.unrealengine.com/marketplace/en-US/product/kyoto-alley>
13. Unreal engine marketplace, modern chinese interior (2022), <https://www.unrealengine.com/marketplace/en-US/product/modern-chinese-interior>
14. Unreal engine marketplace, modular building set (2022), <https://www.unrealengine.com/marketplace/en-US/product/modular-building-set>
15. Unreal engine marketplace, realistic lab. laboratory equipment (2022), <https://www.unrealengine.com/marketplace/en-US/product/realistic-lab-equipment>
16. Unreal engine marketplace, science lab (2022), <https://www.unrealengine.com/marketplace/en-US/product/science-lab>
17. Unreal engine marketplace, suburb neighborhood house pack (2022), <https://www.unrealengine.com/marketplace/en-US/product/suburb-neighborhood-house-pack-modular>
18. Unreal engine, rendering and graphics (2022), <https://docs.unrealengine.com/4.26/en-US/RenderingAndGraphics/Overview/>
19. Tome, D., Peluse, P., Agapito, L., Badino, H.: xr-egopose: Egocentric 3d human pose from an hmd camera. In: Proceedings of the IEEE/CVF International Conference on Computer Vision (ICCV) (2019)

20. Xu, W., Chatterjee, A., Zollhoefer, M., Rhodin, H., Fua, P., Seidel, H.P., Theobalt, C.: Mo<sup>2</sup>Cap<sup>2</sup> : Real-time mobile 3d motion capture with a cap-mounted fisheye camera. IEEE Transactions on Visualization and Computer Graphics (2019)
